# Supplementary material for: The first example of Tb3-containing metallopolymer-type hybrid materials with efficient and high color-purity green luminescence
Source: Royal Society of Chemistry journal article supplement (doi:10.1039/c5dt00141b), 2015-01-01

Supporting information for *Dalton Trans.*

## **First example of Tb<sub>3</sub>-containing metallopolymer-type hybrid materials with efficient and high color-purity green luminescence**

**Zhao Zhang,<sup>a</sup> Heini Feng,<sup>a</sup> Lin Liu,<sup>a</sup> Chao Yu,<sup>a</sup> Xingqiang Lü,<sup>\*a</sup> Xunjin Zhu,<sup>b</sup> Wai-Kwok Wong,<sup>b</sup> Richard A. Jones,<sup>c</sup> Mei Pan<sup>d</sup> and Chengyong Su<sup>\*d</sup>**

*<sup>a</sup>School of Chemical Engineering, Shaanxi Key Laboratory of Degradable Medical Material, Northwest University, Xi'an 710069, Shaanxi, P. R. China*

*<sup>b</sup>Department of Chemistry, Hong Kong Baptist University, Waterloo Road, Kowloon Tong, Hong Kong, P. R. China*

*<sup>c</sup>Department of Chemistry and Biochemistry, The University of Texas at Austin, 1 University Station A5300, Austin, TX 78712-0165, United States*

*<sup>d</sup>MOE Laboratory of Bioinorganic and Synthetic Chemistry/KLGH EI of Environment and Energy Chemistry, School of Chemistry and Chemical Engineering, Sun Yat-Sen University, Guangzhou 510275, Guangdong, China*

To whom correspondence should be addressed.

\*Xingqiang Lü: 86-29-88302312(o); E-mail: [lvxq@nwu.edu.cn](mailto:lvxq@nwu.edu.cn)

\*Chengyong Su: 86-20-84115178(o); E-mail: [cesscy@mail.sysu.edu.cn](mailto:cesscy@mail.sysu.edu.cn)

## Supporting information

### Synthesis of PMMA in activation with AIBN

The homogeneous polymerization of MMA in activation with AIBN for comparison was carried out in a Fisher–Porter glass reactor and protected by nitrogen according to the standard radical polymerization procedure. To a solution of MMA (2 mL, 19 mmol) in dry 1,2-dichlorobenzene (15 mL), AIBN initiator (46.0 mg, 1.5 mol% of the monomer) was added, and the resultant homogeneous solution was purged with N<sub>2</sub> for 10 min and sealed under a reduced N<sub>2</sub> atmosphere. The mixture was heated to 80 °C with continuous stirring for 24 h. The viscous mixture was diluted with dry 1,2-dichlorobenzene (10 mL) and precipitated with absolute diethyl ether (100 mL) for three times. The resulting solid product of PMMA was collected by filtration and dried at 45 °C under vacuum to constant weight. Yield: 91%. IR (KBr, cm<sup>-1</sup>): 3000 (w), 2951 (m), 2843 (w), 1728 (s), 1631 (m), 1602 (m), 1485 (w), 1454 (w), 1433 (w), 1398 (m), 1384 (m), 1337 (w), 1269 (w), 1238 (w), 1138 (vs), 993 (m), 914 (w), 840 (m), 808 (w), 750 (m), 617 (w), 544 (w), 513 (w), 482 (w). <sup>1</sup>H NMR (400 MHz, DMSO-*d*<sub>6</sub>-CDCl<sub>3</sub> (v/v = 10:1)):  $\delta$  (ppm) 3.57 (s, 3H, -COOMe), 1.85 (b, 2H, -CH<sub>2</sub>-), 0.91 (m, 3H, -CH<sub>3</sub>).

### Synthesis of PNBE in activation with H-Grubbs II

The homogeneous polymerization in activation with H-Grubbs II for comparison was carried out in a Fisher–Porter glass reactor and protected by nitrogen according to the typical ROMP procedure. To a solution of NBE (70 mg, 0.75 mmol) in absolute CHCl<sub>3</sub> (15 mL), H-Grubbs II initiator (1.1 mg, 1.5 mol-% of NBE) was added in three times (0.6 mg, 0.3 mg and 0.2 mg),

and the resultant mixture was purged with N<sub>2</sub> for 10 min and sealed under a reduced N<sub>2</sub> atmosphere. After the homogeneous solution was continuously stirred at room temperature for 24 h, ethyl vinyl ether (100 μL) was added to quench the reaction. The viscous mixture was diluted with absolute THF (20 mL) and dried at 45 °C under vacuum to constant weight. For **PNBE**: Yield: 92%. IR (KBr, cm<sup>-1</sup>): 2924 (m), 2853 (s), 1944 (w), 1450 (s), 1432 (s), 1401 (w), 1370 (w), 1346 (w), 1303 (w), 1180 (w), 1069 (w), 1028 (w), 996 (w), 941 (w), 735 (s), 698 (vs), 540 (w). <sup>1</sup>H NMR (400 MHz, CDCl<sub>3</sub>): δ (ppm) 5.33 (s, =CH-), 2.42 (s, -CH), 1.81 (m, -CH<sub>2</sub>), 1.29 (m, -CH<sub>2</sub>), 1.03 (m, -CH<sub>2</sub>).

### Captions to Tables 1-2S and Figures 1-3S

**Table 1S** Selected bond lengths (Å) and bond angles (°) for **3**·2MeOH·4H<sub>2</sub>O

**Table 2S** GPC data of the samples of **PMMA**, **PNBE** and the series of metallopolymers **Poly(NBE-1)**, **Poly(NBE-2)**, **Poly(NBE-3)** and **Poly(NBE-4)**

**Figure 1S** Perspective drawing of the weak N1-H1···Cl5 H-bonding (3.045(2) Å) interaction between the host framework and the free Cl5 in complex **3**·2MeOH·4H<sub>2</sub>O.

**Figure 2S** Visible emission and excitation spectra of complex **4** in MeCN solution at 1 × 10<sup>-5</sup> M and the hybrid materials **4@PMMA** and **Poly(NBE-4)** with the feeding molar ratio of 400:1 in solid state at 77 K.

**Table 1S**

| <b>3·2MeOH·4H<sub>2</sub>O</b> |           |                 |           |
|--------------------------------|-----------|-----------------|-----------|
| Tb(1)-O(1)                     | 2.396(12) | Tb(2)-O(7)      | 2.326(11) |
| Tb(1)-O(2)                     | 2.525(14) | Tb(2)-O(8)      | 2.588(13) |
| Tb(1)-O(5)                     | 2.313(13) | Tb(2)-N(2)      | 2.454(15) |
| Tb(1)-O(10)                    | 2.395(15) | Tb(2)-N(4)      | 2.473(14) |
| Tb(1)-N(6)                     | 2.518(15) | Tb(3)-O(3)      | 2.349(10) |
| Tb(1)-Cl(1)                    | 2.648(6)  | Tb(3)-O(4)      | 2.472(13) |
| Tb(1)-Cl(2)                    | 2.706(7)  | Tb(3)-O(7)      | 2.290(12) |
| Tb(2)-O(1)                     | 2.344(12) | Tb(3)-O(9)      | 2.406(12) |
| Tb(2)-O(3)                     | 2.333(11) | Tb(3)-N(8)      | 2.492(16) |
| Tb(2)-O(5)                     | 2.325(11) | Tb(3)-Cl(3)     | 2.692(5)  |
| Tb(2)-O(6)                     | 2.575(13) | Tb(3)-Cl(4)     | 2.689(5)  |
| <br>                           |           |                 |           |
| Tb(1)-Tb(2)                    | 3.856(3)  | Tb(2)-Tb(3)     | 3.837(4)  |
| C(9)-C(10)                     | 1.304(19) | C(43)-C(44)     | 1.297(10) |
| C(26)-C(27)                    | 1.302(10) | C(60)-C(61)     | 1.303(10) |
| N(1)-H(1)···Cl(5)              | 3.045(2)  |                 |           |
| <br>                           |           |                 |           |
| O(1)-Tb(1)-O(2)                | 63.8(4)   | O(3)-Tb(3)-O(4) | 66.2(4)   |
| O(1)-Tb(1)-O(5)                | 68.8(4)   | O(3)-Tb(3)-O(7) | 68.5(4)   |
| O(5)-Tb(1)-N(6)                | 71.5(4)   | O(7)-Tb(3)-N(8) | 73.5(5)   |
| O(5)-Tb(2)-O(6)                | 63.9(4)   | O(1)-Tb(2)-N(2) | 73.0(5)   |
| O(7)-Tb(2)-O(8)                | 63.4(4)   | O(3)-Tb(2)-N(4) | 72.2(4)   |

**Table 2S**

| Sample             | Monomer | NBE/Complex | $M_n^a$ /g·mol | PDI <sup>b</sup> |
|--------------------|---------|-------------|----------------|------------------|
| <b>PMMA</b>        | MMA     | -           | 45255          | 1.15             |
| <b>PNBE</b>        | NBE     | -           | 24302          | 2.03             |
| <b>Poly(NBE-1)</b> | NBE/1   | 400:1       | 20020          | 2.23             |
| <b>Poly(NBE-2)</b> | NBE/2   | 400:1       | 21073          | 2.11             |
| <b>Poly(NBE-3)</b> | NBE/3   | 200:1       | 23625          | 2.17             |
| <b>Poly(NBE-3)</b> | NBE/3   | 400:1       | 24125          | 2.21             |
| <b>Poly(NBE-3)</b> | NBE/3   | 600:1       | 25778          | 2.26             |
| <b>Poly(NBE-3)</b> | NBE/3   | 800:1       | 25592          | 2.32             |
| <b>Poly(NBE-4)</b> | NBE/4   | 400:1       | 22912          | 2.58             |

<sup>a</sup>  $M_n$  is the number average molecular weight.

<sup>b</sup> PDI =  $M_w/M_n$ , where  $M_w$  is the weight average molecular weight.

Figure 1S

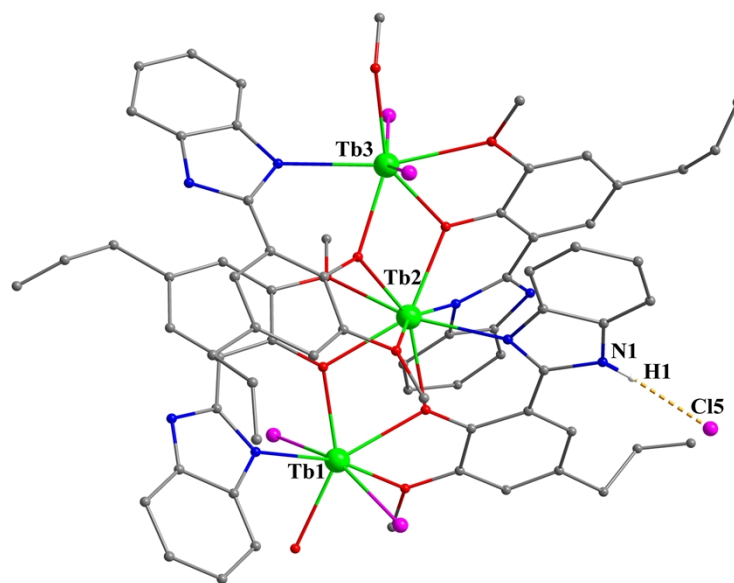

Figure 2S

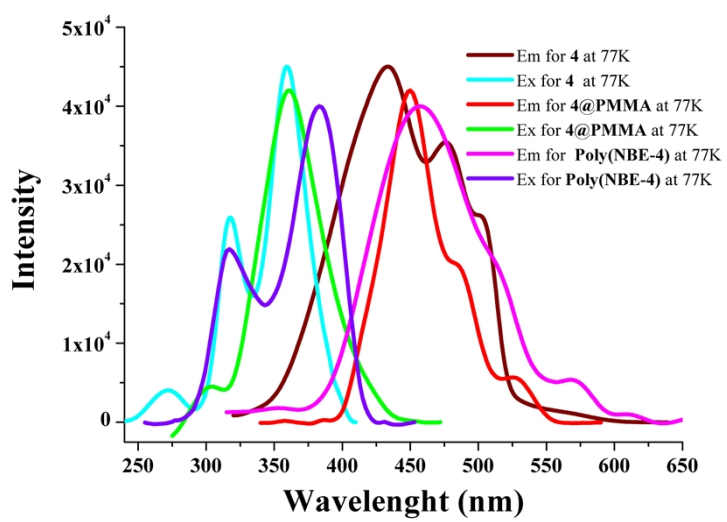

Supplement: c5dt00141b1.pdf [file c5dt00141b1.pdf]
